1 **Establishment of the Body Condition Score for adult female**

2 ***Xenopus laevis***

3 Leonie Tix<sup>1</sup>, Lisa Ernst<sup>1</sup>, Britta G. Bungardt<sup>1</sup>, Steven R. Talbot<sup>2</sup>, Gero Hilken<sup>3</sup>, René H. Tolba<sup>1\*</sup>

4

5 <sup>1</sup>Institute for Laboratory Animal Science & Experimental Surgery, RWTH Aachen University,  
6 Faculty of Medicine, Aachen, Germany

7 <sup>2</sup>Institute for Laboratory Animal Science, Hannover Medical School, Hannover, Germany

8 <sup>3</sup>University Hospital Essen, Central Animal Laboratory, University Hospital Essen, University  
9 Duisburg-Essen, Essen, Germany

10

11 \*Corresponding author: E-mail: [rtolba@ukaachen.de](mailto:rtolba@ukaachen.de) (RHT)

12

## 13 **Abstract**

14 The assessment of animals' health and nutritional status using a Body Condition Score (BCS)  
15 has become a common and reliable tool in lab-animal science. It enables a simple, semi-  
16 objective, and non-invasive assessment (palpation of osteal prominences and subcutaneous fat  
17 tissue) in routine examination of an animal. In mammals, the BCS classification contains 5  
18 levels: A low score describes a poor nutritional condition (BCS 1-2). A BCS of 3 to 4 is  
19 considered optimum, whereas a high score (BCS=5) is associated with obesity. While BCS  
20 are published for most common laboratory mammals, these assessment criteria are not  
21 directly applicable to clawed frogs (*Xenopus laevis*) due to their intracoelomic fat body  
22 instead of subcutaneous fat tissue. Therefore this assessment tool is still missing for *Xenopus*  
23 *laevis*.

24 The present study aimed to establish a species-specific BCS for clawed frogs in terms of  
25 experimental refinement. Accordingly, 62 adult female *Xenopus laevis* were weighed and  
26 sized. Further, the body contour was defined, classified, and assigned to BCS groups.

27 A BCS 5 was associated with a mean body weight of 193.3 g ( $\pm$  27.6 g), whereas a BCS 4  
28 ranged at 163.1 g ( $\pm$ 16.0 g). Animals with a BCS=3 had an average body weight of 114.7 g  
29 ( $\pm$ 16.7 g). A BCS=2 was determined in 3 animals (103 g, 110 g, and 111 g). One animal had a  
30 BCS=1 (83 g), which would be equivalent to a humane endpoint.

31 In conclusion, individual examination using the presented visual BCS provides a quick and  
32 easy assessment of nutritional status and overall health of adult female *Xenopus laevis*. Due to  
33 their ectothermic nature and the associated special metabolic situation, it can be assumed that  
34 a BCS  $\geq$ 3 is to be preferred for female *Xenopus laevis*. In addition, BCS assessment may  
35 indicate underlying subclinical health problems that require further diagnostic investigation.

36

## 37 **Introduction**

38 *Xenopus laevis*, the Smooth or South African clawed frog, belongs to the genus *Xenopus* and  
39 the family Pipidae and is classified in the order Anura. There are numerous *Xenopus* species  
40 and subspecies described. However, only the larger *Xenopus laevis* and the much smaller  
41 African dwarf frog (*Xenopus tropicalis*) are relevant for animal research (1).

42 The first described use of South African clawed frogs for experimental and testing purposes  
43 dates back many decades. It was quickly recognized that they were suitable experimental  
44 animals, and scientists started to enable and improve their husbandry and breeding. Since adult  
45 clawed frogs, in particular, are undemanding in terms of husbandry, they can be kept and bred  
46 for long periods with little effort (2-8). Their use and application as a testing method for  
47 pregnancy until the 1960s earned the frogs the nickname "Apothekerfrosch" (pharmacy frog)  
48 in Germany. Since then, the undemanding, purely aquatic amphibians have become integral to  
49 laboratory animal science (9). For example, according to the number of animals reported in the  
50 annual German laboratory animal reports (Ordinance on the Reporting of Vertebrates or  
51 Cephalopods Used for Experimental Purposes or Vertebrates Used for Certain Other Purposes,  
52 VersTierMeldV 2013), the number of clawed frogs used in German laboratory animal facilities  
53 in 2020 was 10,486 (10).

54 The ability of these frogs to live purely aquatic, to lay hormone-induced repeatedly numerous  
55 eggs in the water (>10,000 eggs/female/year), the resistance of the eggs, and their size made  
56 *Xenopus laevis* a preferred model organism in developmental physiology (11). Spawning of the  
57 animals can be artificially induced by hormone stimulation (injections of human chorionic  
58 gonadotropin (hCG) into the dorsal lymph sac (12) or via the tank water (13)). In addition,  
59 surgical removal of ovarian tissue by laparotomy or spreading are possible ways to obtain  
60 unfertilized eggs (1).

61 This causes the preferential interest in female *Xenopus laevis* within animal-based research.  
62 Furthermore, due to their high life expectancy ( $\geq 20$  years) (14), the animals can be used for  
63 several years until the egg quality or egg quantity decreases (15) to the extent that the animals  
64 have to be excluded from experiments.

65 Usage of *Xenopus laevis* in research certainly focuses on genetic material manipulation, and  
66 the developmental processes in the eggs and the tadpoles. In addition, the research of  
67 physiological processes in the cell (e.g., nuclear pore proteins) is of interest (2, 16-18).

68 Despite their widespread use, determining these animals' health affection or suffering through  
69 chronic experiments or housing conditions is quite challenging. Unlike other laboratory  
70 animals, these animals do not have comparable facial expressions (see available grimace scales  
71 for mice, rats, pigs, sheep, monkeys, horses, etc. (15)). Their facial expressions cannot address  
72 the experimentally-related severity. Their physiology, strongly influenced by the housing  
73 conditions, is not comparable to that of mammals (19). Due to their ectothermy, standard  
74 assessment parameters can only be transferred to amphibians with difficulties. Parameters such  
75 as body temperature, skin turgor, telemetry, behavioral testing, and recurrent hematological or  
76 serological examinations are inappropriate measures or need to be adjusted. Some of these  
77 parameters are potentially suitable for application to the clawed frog (blood tests, behavioral  
78 tests (20-22)) but are complex or still immature in their routine applicability.

79 In addition to experiments or housing conditions, infections and parasite infestations can  
80 weaken the animals. There are few reports on disease in clawed frogs (1, 6, 23). International  
81 trade of the invasive South African clawed frog (*Xenopus laevis*), a subclinical carrier of the  
82 fungal pathogen *Batrachochytrium dendrobatidis* (Bd), has been proposed as a primary means of  
83 the introduction of Bd into native, susceptible amphibian populations. The historical presence  
84 of *B. dendrobatidis* in the indigenous African population of *Xenopus* is well documented (24,  
85 25)

86 Moreover, the assessment of individual *Xenopus laevis* is complicated and highly variable by  
87 the following factors: often, large groups of animals per tank, close contact between animals  
88 (heap lying), influence of water quality, temperature, and feeding factors on weight  
89 development and growth.

90 In general hygienic and species-appropriate husbandry conditions, adequate feeding, qualified  
91 personnel, and correct handling of the animals are assumed to be the essential prerequisites for  
92 a stable state of health and body condition of the animals. However, even for this widely used  
93 species, species-specific criteria are still needed to determine, assess, and evaluate possible  
94 severity in animal experiments. It must be possible to determine the severity of an individual  
95 specimen at the actual time and during the experiment, considering its species-specific anatomy,  
96 physiology, and behavior. In principle, the preparation of this severity assessment is required  
97 by law as a prospective assessment already in the experimental design (e.g., Annex VIII EU  
98 Directive 2010/63 or § 7 para. 1, no. 2, § 8 section. 1, no. 7 German Animal Welfare Act, § 17)  
99 (26, 27). Here, animal experiments commonly use species and protocol-specific score sheets as  
100 assessment tools. In Germany, recommendations for severity assessment in animal experiments  
101 and explicitly for clawed frogs are made by the Committee for Animal Welfare Officers of the  
102 GV-SOLAS (28).

103 In general, different criteria are required for the assessment of an individual (29), e.g.:

- 104 • assess the animal with as little stress as possible
- 105 • identify and rank the expected signs of severity using predefined criteria
- 106 • can be applied by various personnel in the same way
- 107 • be able to record and depict the chronological course of severity that occur
- 108 • enable predictions of potential, expected, and subsequent severity
- 109 • enable documentation of progress controls in the case of treatment
- 110 • Definition of termination criteria or humane endpoints.

111 At the same time, the quantitative, qualitative, and temporal criteria to be investigated must be:

- 112 • adapted to the experimental design (here, e.g., surgical intervention with wound suture  
113 or injection for egg laying)
- 114 • chosen to recognize severity caused by changes in individual behavior or organ systems  
115 (e.g., skin changes, lethargy, emaciation).

116 For a proper severity assessment of *Xenopus laevis*, compliance with husbandry and hygiene  
117 regulations is indispensable. Likewise, a basic knowledge of physiology, anatomy and the  
118 biological activity pattern of the test animal needs to be assessed (30). Here, the body condition  
119 score is another standard tool for severity or health assessment. This score determines the  
120 nutritional status based on palpable bone landmarks and subcutaneous fat depots and classifies  
121 animals into 5 nutritional levels, ranging from emaciated up to obese.

122 In other laboratory animal species, the use of those species-specific body condition scores  
123 (BCS) is already established (zebrafish, mouse, rat, rabbit, cats, dog, sheep, pig, NHP), but there  
124 is still no BCS for clawed frogs (31-40). It should be noted that *Xenopus* do not have palpable  
125 subcutaneous adipose tissue, as their only fat body is intracoelomic (41). Thus, standard  
126 examination criteria are difficult to transfer to the frog due to its particular anatomy. The score  
127 described here represents a simple approach for the experimental refinement of these animals  
128 within procedures.

129 The study aimed to establish a scoring system able to assess the condition of frogs using non-  
130 invasive and objective assessment criteria. This score can be used as an additional tool in the  
131 scoring process and routine animal check-ups, e.g., as an individual health status indicator.  
132 Further, we investigated whether the classification to a BCS group depends on the body weight  
133 or the length of a *Xenopus laevis*.

134 Due to the typical experimental approaches of the research groups working with the animals  
135 assessed here, the present study's used female adult *Xenopus laevis* animals to establish the  
136 body condition score.

## 137 **Materials and Methods**

### 138 **Animals and husbandry**

139 The animals were bred by the commercial breeder Xenopus1 (Xenopus-I Inc, Michigan, USA)  
140 as lab-breed animals for experimental purposes. They were ordered with a body size of at least  
141 12 cm in length (nose to cloaca). This assumed that all animals were sexually mature and of  
142 adult age and could be used for egg laying protocols after acclimation at the experimental site.  
143 The Governmental Animal Care and Use Committee approved the housing and use of all  
144 animals for scientific purposes (Reference No.: 81-02.04.2020.A107; 81-02.04.2019.A355; 81-  
145 02.04.2019.A356; Landesamt für Natur, Umwelt und Verbraucherschutz Recklinghausen,  
146 Nordrhein-Westfalen, Germany).

147 The animals used were kept in three different husbandry systems:

148 1. individual water tanks (length x width x height (LxWxH): 115x55x36 cm), no water  
149 conditioning; average water temperature 15°C, n= 20 animals.

150 2. circulating, a semi-closed system with 4 tanks arranged in parallel (Aqua Schwarz GmbH,  
151 Göttingen, Germany; LxWxH: 99x50x21 cm); conditioning of water by mechanical filtration  
152 systems and UV radiation; average water temperature 19°C, n= 20 animals

153 3. circulating, a semi-closed system with 17 tanks arranged in parallel (Aqua Schwarz,  
154 Göttingen, Germany; LxWxH: 100x50x25 cm); conditioning of water by mechanical filtration  
155 systems, UV radiation, demineralization, salting, and activated carbon filtration; average water  
156 temperature 20°C, n= 22 animals.

157 All animals were marked for individual identification with numbered metal tags (mouse ear tag,  
158 ITEM: 56779, Stoelting Co., Ireland) inserted into the webbing of the lateral outer toes of the  
159 right hind leg.

160 A total of 62 female adult *Xenopus laevis* were assessed within this study. The examined  
161 animals were randomly selected, whereas at least 20 animals of each husbandry system were  
162 used. All animals were fed every working day with a formulated dry pellet diet (Ssniff  
163 Spezialdiäten GmbH, Soest, Germany, Alleinfuttermittel für Krallenfrösche, V7106-030, 5 mm  
164 extrudate, 3 pellets per animal). Feed that was not immediately ingested was removed after 30  
165 minutes. Within one day (24h), 3-5 % of the total water volume was replaced by fresh water by  
166 continuous rinsing. The day-night cycle was 12 hours each. The monitoring of the tank system  
167 and the animal population, as well as the corresponding documentation of the water quality,  
168 took place daily.

## 169 **Body Condition Scoring (BCS)**

170 The presented BCS is based on established concepts of body condition scores of other species  
171 (31-34, 38, 39, 42), including *Xenopus laevis*- specific physical characteristics of its body. The  
172 classification is made in 5 ascending score levels (Figure 1, Figure 2), whereby BCS 1 is  
173 associated with a humane endpoint due to emaciation (Figure 4), and a BCS 5 is regarded as a  
174 very well nourished physical state. The shape of the upper, lower, and lateral body silhouette,  
175 muscling and fleshing of the hind limbs, and visibility/protrusion of the thoracic and pelvic  
176 bone points are considered in the evaluation. The following assessment criteria are  
177 distinguished and defined for the respective BCS levels.

### 178 **BCS 1**



179 Frog emaciated (--): rectangular body shape; raised abdominal contour and flat dorsal contour;  
180 bony structures of thorax and pelvis are prominent in ventral view; skinny limbs firmly set off  
181 from trunk; humane endpoint reached.

## 182 **BCS 2**

183 Frog lean (-): almost rectangular body shape with only slight curves left above the insertion of  
184 the posterior extremities; flat abdomen and dorsal contour; bone structures of the thorax can be  
185 adumbrated in ventral view; lean limbs set off from the trunk.

## 186 **BCS 3**

187 Frog moderately well-conditioned (+): slightly convex silhouette (also at the ventral and dorsal  
188 contour); limbs set off from trunk with early fleshing and pronounced musculature.

## 189 **BCS 4**

190 Frog well-conditioned (++) : slightly pear-shaped body; abdominal and dorsal contour with  
191 unmistakable convex silhouette; muscular thighs.

## 192 **BCS 5**

193 Frog very well nourished (+++): pear-shaped body; upper and lower body contour with even,  
194 distinct convex curvature; fleshy, very muscular limbs.

## 195 **Body weight and metrics**

196 To assess the animals, they were individually removed from their housing tank with a fishing  
197 net, placed in an empty bowl, and weighed. Then the body dimensions were determined with a  
198 flexible ruler (nose-cloaca length, NCL). Hereafter, the bowl was filled with water and scored  
199 and photographed from above and from the side. Here, the water was taken from the animals'  
200 housing tank to avoid distress for the animal.

## 201 **Statistics**

202 Statistical analyses were performed in R (v4.0.3) (43). Data were tested against the hypothesis  
203 of normal distribution using the Shapiro-Wilk test and were visually inspected with a QQplot.  
204 Normally distributed body weight data were analyzed in linear regression with treatment  
205 contrasts (BCS=5 as the intercept level). BCS-class differences were represented as relative  
206 coefficient differences (planned contrasts) and were reported as estimates ( $\beta$ ) with the  
207 corresponding standard errors (SE) as well as the p-values. Between BCS-class differences  
208 were analyzed with a one-way analysis of variance, followed by Tukey-Kramer post hoc tests  
209 to adjust for multiple comparisons. Post hoc test results were expressed as marginal means. In  
210 the nose-cloaca length (NCL) analysis, the body weight was analyzed as a fixed effect and for  
211 its interaction with BCS (bw:BCS). Both models were compared in a likelihood-ratio test using  
212 the lmtest package (44). The following p-values were considered significant at the levels:  
213  $p < 0.05$  (\*),  $p < 0.01$  (\*\*), and  $p < 0.001$  (\*\*\*). Data were visualized with the ggplot2 package  
214 (45).

## 215 **Results**

216 A total of 62 adult female *Xenopus laevis* were assessed within this study. While BCS 1 is  
217 accompanied by a humane endpoint and should not occur in an ideal healthy animal population,  
218 this score was observed once. The BCS 2 group comprised 3 frogs, and the BCS 3 group  
219 included 16 animals. In comparison, BCS groups associated with good up to optimal nutritional  
220 status were found in 18 (BCS4) and 24 (BCS5) animals. The absolute body weights of the  
221 animals ranged from 83 g to 235 g. The allocation to the respective BCS groups is shown in  
222 Table 1.

223 Normally distributed frog body weight data ( $W = 0.980$ ,  $p\text{-value} = 0.42$ ) were fit with a linear  
224 regression using the BCS as the independent variable. The BCS consisted of five-factor levels

225 with BCS=5 as the optimal score. The regression coefficients expressed the average change in  
226 body weight per BCS class regarding the intercept level of the model (treatment contrasts). The  
227 overall model was significant ( $F(4,57)=22.55$ ,  $p<0.001$ ,  $R_{adj}=0.586$ ). Figure 3A shows the  
228 variance distribution in each BCS class as violin plots. The 95 % confidence intervals overlap  
229 between BCS=4 and BCS=3, indicating ambiguity in BCS-class attribution using body weight  
230 as the sole predictor. This was confirmed by a non-significant post hoc test ( $\Delta\beta_{BCS4-\beta_{BCS3}}=18.40$ ,  
231  $SE=7.54$ ,  $p=0.1197$ ). Therefore, there was no clear body weight difference between BCS  
232 classes 4 and 3. The estimates in Table 2 indicate the average body weights per BCS class. For  
233 example, the body weight of BCS=5 was estimated at  $\beta_{intercept}=193.275$  g ( $SE=4.481$ ,  $p<0.001$ ).  
234 The body weight of BCS=4 was significantly lower at 163.067 g ( $\beta_{BCL4}=-30.208$ ,  $SE=6.845$ ,  
235  $p<0.001$ ), followed by BCS=3 with 144.669 g ( $\beta_{BCL3}=-48.606$ ,  $SE=7.085$ ,  $p<0.001$ ) and BCS=2  
236 with 104.667 g ( $\beta_{BCL2}=-88.608$ ,  $SE=13.443$ ,  $p<0.001$ ). The largest difference in body weight  
237 was observed in BCS=1 to BCS=5. Here, a difference of  $\beta_{BCL1}=-110.275$  ( $SE=22.404$ ,  $p<0.001$ )  
238 led to a body weight of 83 g. However, in the BCS=1 group, only one animal was observed.

239 The frog nose-cloaca length (NCL) was modeled as a function of the body weight in linear  
240 regression. Figure 3B shows the linear regression line of the model with its 95 % confidence  
241 band. The model was significant ( $F(1,59)=119.9$ ,  $p<0.001$ ,  $R_{adj}=0.665$ ), and the average NCL  
242 was estimated as 8.82 cm. The continuous body weight variable contributed significantly to the  
243 model ( $\beta_{bw}=0.02$ ,  $SE=0.002$ ,  $p<0.001$ ), corroborating the linear Pearson correlation of body  
244 weight and NCL ( $r=0.81$ ,  $CI_{95\%}[0.714; 0.887]$ ,  $p<0.001$ ).

245

246 Further, the BCS is highlighted in Figure 3B, ranging from pink (BCS=1) to dark green  
247 (BCS=5) color. Lower BCSs appeared to relate to shorter body lengths and lower weights.  
248 However, the *between*-class transitions were diffuse. Therefore, the linear model was expanded

249 by the bw:BCS interaction to estimate the BCS's independence from body weight (Table 3).  
250 The model with the interaction term was significant ( $F(4,56)=40.46$ ,  $p<0.001$ ,  $R_{adj}=0.725$ ) and  
251 showed a significant body weight coefficient ( $\beta_{bw}=0.025$ ,  $SE=0.45$ ,  $p<0.001$ ). Additionally, the  
252 interactions for bw:BCS4 ( $\beta_{bw:BCS4}=0.002$ ,  $SE=0.001$ ,  $p=0.046$ ) and bw:BCS3 ( $\beta_{bw:BCS3}=0.004$ ,  
253  $SE=0.001$ ,  $p<0.001$ ) were significant, indicating interdependence from both variables, body  
254 weight and the BCS. The interaction of bw:BCS2, however, was not significant at the  $p\leq 0.05$   
255 threshold but at the  $p\leq 0.1$  level ( $\beta_{bw:BCS2}=0.005$ ,  $SE=0.003$ ,  $p<0.0921$ ), still providing evidence  
256 for the interaction of body weight and BCS with lower sample sizes ( $n_{BCS2}=3$ ). The significant  
257 bw:BCS interaction term requires both variables, body weight, and BCS, to model the NCL.  
258 Finally, the body weight and interaction models were compared in a likelihood-ratio test to  
259 evaluate whether the more complex model adds any benefit. The model with the bw:BCS  
260 interaction is more complex with 6 degrees of freedom, compared to the model with body  
261 weight only ( $df=3$ ). Adding the interaction term leads to a significantly better performing model  
262 ( $X^2=15.21$ ,  $p=0.002$ ), so the hypothesis of restricting the model to a more straightforward  
263 design can be rejected.

## 264 Discussion

265 The first Body Condition Score (BCS) for adult female *Xenopus laevis* was developed and  
266 introduced in this study. This BCS intend to be used for severity assessment in animal  
267 husbandry and as an additional parameter in the preparation of protocol-specific score sheets  
268 (46) and health examination of adult female *Xenopus laevis*.

269 With increasing age ( $\geq 20$  years) (14), however, egg quality decreases (15), so that on the one  
270 hand, the limited productive life of the animals in the trials is justified. In addition, the animals  
271 are used only a limited number of times for egg production to not exceed a moderate degree of  
272 severity. Therefore, biological age is probably not generally reached in the experimental use of

273 clawed frogs. However, since only body length and not the age of the animals are decisive for  
274 the purchase by the breeder, no predictions can be made regarding the impact of age on body  
275 weight and BCS in the present study.

276 Hence, the BCS represents the physical status in relation to the individual's body size,  
277 independent of other factors. In previously published body condition scores of other species,  
278 high score values are usually associated with obesity and thus possible pathological over  
279 conditioning of the animals (47, 48). These body condition score systems distinguish between  
280 emaciated and obese animals and therefore define a mid-level as well-conditioned (31, 32) or  
281 even as optimum (34, 40, 49). Our data indicate that in *Xenopus laevis* the BCS 4 and 5 are  
282 above a physiological optimum but are not associated with a pathological or avoidable  
283 condition and thus represent the desirable condition. This is justified by the fact that due to their  
284 particular anatomy and adaptive (ectothermic) metabolism, the animals should be physically  
285 resilient to withstand experimental severity (e.g., induced laying of eggs, surgical ovariectomy)  
286 (41, 50, 51). However, care must be taken to distinguish appropriate disease symptoms that  
287 cause biased body shape from the normal condition, e.g., lymph sac edema. (see Figure 5). The  
288 lymphatic sac edema is a common clinical picture in clawed frogs (52), which must be  
289 distinguished from healthy, obese animals. It should be taken into account that in dorsal view,  
290 the body shape of animals of BCS 5 may be similar to the body shape of frogs with edema of  
291 the dorsal lymph sac.

292 This assumption is justified by the fact that the body composition, ratio, and anatomical position  
293 of fat and muscle mass are different from that of mammals. There is no palpable subcutaneous  
294 fat tissue which allows conclusions to be drawn about the general nutritional status (41). Rather,  
295 in this species, a large digitiform fat body exists inside the body cavity (celomic cavity) and  
296 can, therefore, neither be assessed visually nor palpated during the examination. At this point,  
297 however, it is impossible to determine if the dimension of the fat body correlates with the actual

298 body weight and which size the fat bodies of the animals of different BCS groups have. This  
299 would require imaging techniques (e.g., CT or ultrasound) or at least surgical resection of the  
300 fat body, which is impossible in the context of the experiments presented here. Another  
301 assessment criterion for the physical health condition is measuring the actual body weight and  
302 dimensions of the individuals. Both factors can fluctuate significantly due to the intervention  
303 (egg laying, surgery, health status, etc.), so this parameter should be evaluated as far as possible  
304 during the assessment and always only in combination with the BCS. Depending on the method  
305 used to obtain the oocytes/eggs (induction by injection or surgical removal of the ovary), this  
306 may affect the animal's body weight. However, these interventions do not affect body length or  
307 hindlimb fleshiness during the BCS assessment (Figures 1 and 2). Since this intervention was  
308 performed in all animals evaluated here, this systematic error can thus be neglected. The  
309 absolute body weights of the animals (ranging from 83 g to 235 g) showed that the different  
310 allocations of the BCS are associated with varying classes of weight in each case (Table 1).  
311 Nevertheless, individual animals belong to the lower or upper limit range or could be classified  
312 in a different body condition group merely due to their weight (Figure 3).

313 Considering the determined values, 33% of the animals show a BCS  $<3$ , which does not  
314 correspond to the desired optimum. This can be explained by the above-mentioned factors (time  
315 since the last spawning, husbandry conditions, metabolic activity, age). In case there are hardly  
316 any animals with BCS 4 or 5 in husbandry, an optimization of the housing conditions and a  
317 detailed evaluation of the animal population (health monitoring, age, convalescence phases  
318 after interventions) is urgently recommended.

319 In the performing facility, animals with a BCS 2 are separated, fed, and weight is monitored  
320 strictly (3 times per week). Animals showing a BCS 1 are excluded from the experiment  
321 (humane endpoint).

322

323 However, assessing a clawed frog with the presented body condition score must always be  
324 carried out from two optical perspectives: A lateral view must supplement the information from  
325 the dorsal view. Breathing and the motion of the hind legs can affect the body's contour. While  
326 the external body shape can be easily distorted by inhalation (ventilation of the lungs increases  
327 the convexity of the dorsal contour), the extension of the hind limb elongates the body shape  
328 and its body shape appears less pear-shaped. Therefore, to assess BSC values, the animals are  
329 assessed freely-moving, motionless, and relaxed in a water basin.

330 It is essential to know that neither the absolute body weight of an animal nor its body dimensions  
331 are sufficient to assess the condition of a clawed frog as a single evaluation criterion. These  
332 must always be obtained and interpreted in relation to the BCS of the individual.

## 333 **Conclusion**

334 It could be demonstrated that the different allocations of the BCS are associated with varying  
335 classes of body weight in each case (Table 1). Nevertheless, individual animals belong to the  
336 lower or upper limit range or could be categorized in a different body condition group merely  
337 due to their weight (Figure 3). The Body Condition Score is therefore intended as a simple,  
338 objective tool for personnel involved in experiments and animal caretaker staff to assess  
339 conditional changes in *Xenopus laevis* in chronic experiments (e.g., with a focus on oocyte  
340 collection) or even in mere animal husbandry, and can classify the physical condition of the  
341 animals in general. In addition, this assessment tool tries to define humane endpoints for this  
342 underestimated species based on images, to avoid unnecessary animal suffering (experimental  
343 refinement) (Figure 4). Since the interaction term of bw:BCS is significant and improves the  
344 model, we found evidence for the usefulness of measuring both the body weight and the BCS.  
345 Therefore, it is essential to consider body weight, body shape, and condition when assessing  
346 *Xenopus laevis*.

## 347 **Acknowledgments**

348 We thank Ralf Hausmann, Dominik Wiemuth, Stefan Gründer and Wolfram Antonin for  
349 providing the animals. We would like to thank the animal caretakers Eva Lotte Kaesbach,  
350 Phillip Peters, Leon Heinst, and Martin Heck for their support during the animal examination  
351 and Anna Maria Hartmann and Carina Kallen for their support during the data collection.

352

353

354



## 355 References

- 356 1. Hilken G, Iglauer F, Richter HJ. Der Krallenfrosch *Xenopus laevis* als Labortier: Biologie,  
357 Haltung, Zucht und experimentelle Nutzung. Stuttgart: Ferdinand Enke Verlag; 1997.
- 358 2. Blackburn ATM, Miller RK. Modeling congenital kidney diseases in *Xenopus laevis*. *Dis Model*  
359 *Mech.* 2019;12(4).
- 360 3. Parker F, Jr., Robbins SL, Loveridge A. Breeding, rearing and care of the South African clawed  
361 frog (*Xenopus laevis*). *Am Nat.* 1947;81(796):38-49.
- 362 4. Hilken G, Dimigen J, Iglauer F. Growth of *Xenopus laevis* under different laboratory rearing  
363 conditions. *Laboratory Animals.* 1995;29(2):152-62.
- 364 5. Hilken G, Willmann F, Dimigen J, Iglauer F. Preference of *Xenopus laevis* for different housing  
365 conditions. *SCANDINAVIAN JOURNAL OF LABORATORY ANIMAL SCIENCE.* 1994;21:71-.
- 366 6. Iglauer F, Willmann F, Hilken G, Husinga E, Dimigen J. Anthelmintic treatment to eradicate  
367 cutaneous capillariasis in a colony of South African clawed frogs (*Xenopus laevis*). *Comparative*  
368 *Medicine.* 1997;47(5):477-82.
- 369 7. Gasche P. Die Zucht von *Xenopus laevis*. Dautin und ihre Bedeutung für die biologische  
370 Forschung. *Revue Suisse de Zoologie.* 1943;50:262-9.
- 371 8. Ochse W. Die Zucht des südafrikanischen Krallenfrosches *Xenopus laevis* Dautin.  
372 *Gynaecologia.* 1948(126):57-77.
- 373 9. Vieweg M. "Apothekerfrösche" krallen sich Europa. *naturede.* 2021.
- 374 10. (BfR) BfR. Zahlen zu den im Jahr 2020 verwendeten Versuchstieren. 16.12.2021.
- 375 11. Cannatella DC, de Sá RO. *Xenopus laevis* as a Model Organism. *Systematic Biology.*  
376 1993;42(4):476-507.
- 377 12. Shaidani NI, McNamara S, Wlizla M, Horb ME. Obtaining *Xenopus laevis* Eggs. *Cold Spring*  
378 *Harb Protoc.* 2021;2021(3):pdb.prot106203.
- 379 13. Ogawa A, Dake J, Iwashina YK, Tokumoto T. Induction of ovulation in *Xenopus* without hCG  
380 injection: the effect of adding steroids into the aquatic environment. *Reprod Biol Endocrinol.*  
381 2011;9:11.
- 382 14. Gradl D. *Xenopus laevis* (Südafrikanischer Krallenfrosch). In: Nick P, Fischer R, Gradl D,  
383 Gutmann M, Kämper J, Lamparter T, et al., editors. *Modellorganismen.* Berlin, Heidelberg: Springer  
384 Berlin Heidelberg; 2019. p. 173-95.
- 385 15. Green SL. Factors affecting oogenesis in the South African clawed frog (*Xenopus laevis*).  
386 *Comp Med.* 2002;52(4):307-12.
- 387 16. Tsai TY, Theriot JA, Ferrell JE, Jr. Changes in oscillatory dynamics in the cell cycle of early  
388 *Xenopus laevis* embryos. *PLoS Biol.* 2014;12(2):e1001788.
- 389 17. Borodinsky LN. *Xenopus laevis* as a Model Organism for the Study of Spinal Cord Formation,  
390 Development, Function and Regeneration. *Front Neural Circuits.* 2017;11:90.
- 391 18. Lasser M, Pratt B, Monahan C, Kim SW, Lowery LA. The Many Faces of *Xenopus*: *Xenopus*  
392 *laevis* as a Model System to Study Wolf-Hirschhorn Syndrome. *Front Physiol.* 2019;10:817.
- 393 19. Cohen S, Beths T. Grimace Scores: Tools to Support the Identification of Pain in Mammals  
394 Used in Research. *Animals (Basel).* 2020;10(10).
- 395 20. Rhodes HJ, Yu HJ, Yamaguchi A. *Xenopus* vocalizations are controlled by a sexually  
396 differentiated hindbrain central pattern generator. *J Neurosci.* 2007;27(6):1485-97.
- 397 21. Li WC, Wagner M, Porter NJ. Behavioral observation of *Xenopus* tadpole swimming for  
398 neuroscience labs. *J Undergrad Neurosci Educ.* 2014;12(2):A107-13.
- 399 22. Avila VL, Frye PG. Feeding Behavior in the African Clawed Frog (*Xenopus laevis* Daudin).  
400 *Herpetologica.* 1977;33(2):152-61.
- 401 23. Tinsley RC, Kobel HR, editors. *The biology of Xenopus* 1996: Zoological Society of London  
402 London.

- 403 24. Tinsley RC, Coxhead PG, Stott LC, Tinsley MC, Piccinni MZ, Guille MJ. Chytrid fungus infections  
404 in laboratory and introduced *Xenopus laevis* populations: assessing the risks for UK native  
405 amphibians. *Biological conservation*. 2015;184:380-8.
- 406 25. Vredenburg VT, Felt SA, Morgan EC, McNally SV, Wilson S, Green SL. Prevalence of  
407 *Batrachochytrium dendrobatidis* in *Xenopus* collected in Africa (1871–2000) and in California (2001–  
408 2010). *PLoS One*. 2013;8(5):e63791.
- 409 26. Union E. DIRECTIVE 2010/63/EU OF THE EUROPEAN PARLIAMENT AND OF THE COUNCIL of  
410 22 September 2010 on the protection of animals used for scientific purposes. 22.09.2010.
- 411 27. Bundesgesetz über den Schutz der Tiere (Tierschutzgesetz – TSchG). 29.07.2022.
- 412 28. Dülsner A, Hack R, Krüger C, Manthey T, Paulin N, Pils M, et al. Möglichkeiten der  
413 Belastungsbeurteilung im Tierversuch.
- 414 29. Morton DB. Humane endpoints in animal experimentation for biomedical research: ethical,  
415 legal and practical aspects. London: Royal Society of Medicine Press; 1999. p. 5-12.
- 416 30. McNamara S, Wlizla M, Horb ME. Husbandry, General Care, and Transportation of *Xenopus*  
417 *laevis* and *Xenopus tropicalis*. *Methods Mol Biol*. 2018;1865:1-17.
- 418 31. Clark TS, Pandolfo LM, Marshall CM, Mitra AK, Schech JM. Body Condition Scoring for Adult  
419 Zebrafish (*Danio rerio*). *J Am Assoc Lab Anim Sci*. 2018;57(6):698-702.
- 420 32. Hickman DL, Swan M. Use of a body condition score technique to assess health status in a rat  
421 model of polycystic kidney disease. *J Am Assoc Lab Anim Sci*. 2010;49(2):155-9.
- 422 33. Ullman-Culleré MH, Foltz CJ. Body condition scoring: a rapid and accurate method for  
423 assessing health status in mice. *Lab Anim Sci*. 1999;49(3):319-23.
- 424 34. Prebble JL, Shaw DJ, Meredith AL. Bodyweight and body condition score in rabbits on four  
425 different feeding regimes. *J Small Anim Pract*. 2015;56(3):207-12.
- 426 35. Sweet H, Pearson AJ, Watson PJ, German AJ. A novel zoometric index for assessing body  
427 composition in adult rabbits. *Veterinary Record*. 2013;173(15):369-.
- 428 36. Teng KT, McGreevy PD, Toribio J, Raubenheimer D, Kendall K, Dhand NK. Associations of body  
429 condition score with health conditions related to overweight and obesity in cats. *J Small Anim Pract*.  
430 2018.
- 431 37. Witzel AL, Kirk CA, Henry GA, Toll PW, Brejda JJ, Paetau-Robinson I. Use of a novel  
432 morphometric method and body fat index system for estimation of body composition in overweight  
433 and obese dogs. *J Am Vet Med Assoc*. 2014;244(11):1279-84.
- 434 38. Russel A. Body condition scoring of sheep. *In Pract*. 1984;6(3):91-3.
- 435 39. Doyle RE, Groat J, Wynn PC, Holyoake PK. Physiological and nonphysiological indicators of  
436 body condition score in weaner pigs. *J Anim Sci*. 2015;93(4):1887-95.
- 437 40. Summers L, Clingerman KJ, Yang X. Validation of a body condition scoring system in rhesus  
438 macaques (*Macaca mulatta*): assessment of body composition by using dual-energy X-ray  
439 absorptiometry. *J Am Assoc Lab Anim Sci*. 2012;51(1):88-93.
- 440 41. Fitzpatrick LC. Life History Patterns of Storage and Utilization of Lipids for Energy in  
441 Amphibians. *American Zoologist*. 2015;16(4):725-32.
- 442 42. Ara G M, Jiménez A R, Huamán C A, Carcelén C F, Díaz C D. Development of a body condition  
443 score in guinea pigs: relationships between body condition and quantitative estimates of body fat.  
444 *Revista de Investigaciones Veterinarias del Perú (RIVEP)*. 2012;23(4):420-8.
- 445 43. Team RC. R: A language and environment for statistical computing. 2013.
- 446 44. Zeileis A, Hothorn T. Diagnostic checking in regression relationships. 2002.
- 447 45. Wickham H. *Data analysis. ggplot2*: Springer; 2016. p. 189-201.
- 448 46. Bugnon P, Heimann M, Thalmair M. What the literature tells us about score sheet design.  
449 *Lab Anim*. 2016;50(6):414-7.
- 450 47. Chandler M, Cunningham S, Lund EM, Khanna C, Naramore R, Patel A, et al. Obesity and  
451 Associated Comorbidities in People and Companion Animals: A One Health Perspective. *Journal of*  
452 *Comparative Pathology*. 2017;156(4):296-309.

- 453 48. Yam PS, Butowski CF, Chitty JL, Naughton G, Wiseman-Orr ML, Parkin T, et al. Impact of  
454 canine overweight and obesity on health-related quality of life. *Preventive Veterinary Medicine*.  
455 2016;127:64-9.
- 456 49. Members WNAGTF. NUTRITIONAL ASSESSMENT GUIDELINES. *Journal of Small Animal*  
457 *Practice*. June 2011;Vol 00.
- 458 50. Brenes-Soto A, Dierenfeld ES, Bosch G, Hendriks WH, Janssens GPJ. Gaining insights in the  
459 nutritional metabolism of amphibians: analyzing body nutrient profiles of the African clawed frog,  
460 *Xenopus laevis*. *PeerJ*. 2019;7:e7365.
- 461 51. Zaya RM, Amini Z, Whitaker AS, Kohler SL, Ide CF. Atrazine exposure affects growth, body  
462 condition and liver health in *Xenopus laevis* tadpoles. *Aquatic Toxicology*. 2011;104(3):243-53.
- 463 52. McCallum M. Occurrence of Lymphedema in Wild-Caught Anurans. *bioRxiv*; 2018.
- 464

465 **Tables and Figures:**

466 **Table 1. 5 classes of body condition score assigned by body weight (g).**

| <b>BCS 1</b> | <b>BCS 2</b> | <b>BCS 3</b> | <b>BCS 4</b> | <b>BCS 5</b> |
|--------------|--------------|--------------|--------------|--------------|
| 83           | 111          | 112          | 161          | 173          |
|              | 100          | 146          | 158          | 172          |
|              | 103          | 138          | 119          | 178          |
|              |              | 151          | 147          | 213          |
|              |              | 156          | 167          | 140          |
|              |              | 134          | 172          | 211          |
|              |              | 134          | 146          | 226          |
|              |              | 172          | 190          | 217          |
|              |              | 153          | 150          | 190          |
|              |              | 150          | 174          | 223          |
|              |              | 118          | 157          | 189          |
|              |              | 167          | 171          | 197          |
|              |              | 137          | 181          | 181          |
|              |              | 144          | 166          | 163          |
|              |              | 131          | 172          | 235          |
|              |              | 171          | 173          | 229          |
|              |              |              | 179          | 150          |
|              |              |              | 153          | 227          |
|              |              |              |              | 234          |
|              |              |              |              | 156          |
|              |              |              |              | 194          |

183

195

165

467

468 **Table 2. Linear regression model of BCS ~body weight.**

|                    | Estimate | SE     | t      | p-value | stars |
|--------------------|----------|--------|--------|---------|-------|
| <b>(Intercept)</b> | 193.275  | 4.481  | 43.134 | <0.001  | ***   |
| bcs4               | -30.208  | 6.845  | -4.413 | <0.001  | ***   |
| bcs3               | -48.606  | 7.085  | -6.861 | <0.001  | ***   |
| bcs2               | -88.608  | 13.443 | -6.592 | <0.001  | ***   |
| bcs1               | -110.275 | 22.404 | -4.922 | <0.001  | ***   |

469

470

471 **Table 3. Linear regression model of nose-cloaca length ~bw + bw:BCS.**

|                    | Estimate | SE    | t      | p-value | stars |
|--------------------|----------|-------|--------|---------|-------|
| <b>(Intercept)</b> | 7.661    | 0.446 | 17.186 | <0.001  | ***   |
| bw                 | 0.025    | 0.002 | 10.893 | <0.001  | ***   |
| bw:bcs4            | 0.002    | 0.001 | 2.039  | 0.046   | *     |
| bw:bcs3            | 0.005    | 0.001 | 3.970  | <0.001  | ***   |
| bw:bcs2            | 0.005    | 0.003 | 1.714  | 0.092   | .     |

472

473

474 **Figure 1.: Dorsal section of *Xenopus laevis* and assignment to BCS 1-5, red line in BCS1**  
475 **indicates the nose-cloacal distance.**

476

477 **Figure 2: Lateral section of *Xenopus laevis* and assignment to BCS 1-5:**

478

479 **Figure 3 A.** The violin plot shows the compact distribution of data in each BCS class. Individual  
480 data points are jittered within each category. The mean body weight values are also offered as  
481 red dots, and the error bars represent 1000-fold bootstrapped 95 % confidence intervals.

482 **Figure 3 B.** Scatterplot showing the body weight vs. the nose-cloaca distance, color-highlighted  
483 by BCS classes. The linear trend in the data ( $\beta_{bw}=0.02$ ,  $SE=0.002$ ,  $p<0.001$ ,  $R^2_{adj}=0.665$ ) is  
484 indicated by the linear regression line with a 95 % confidence band.

485

486 **Figure 4: Close-ups pictures of BCS 1: A: dorsal view, B and C: ventral and latero-ventral**  
487 **view, D: lateral view. Humane endpoint:** Frog emaciated (--): rectangular body shape; raised  
488 abdominal contour and flat dorsal contour; bony structures of the thorax as well as pelvis  
489 prominent in ventral view; lower side of the mouth with concave curvature (sunken); skinny  
490 limbs firmly set off from trunk; humane endpoint reached.

491

492

493

494

495 **Figure 5: High-grade lymph sac edema prior (A) and post puncture (B) of the same**  
496 **specimen. C: drained clear punctate in syringes. Difference between BCS 5 and**  
497 **pathological lymphatic sac edema:** Lymphatic sac edema is indicated by an apparent  
498 retraction of the skin between the eyes (see markings top row); skin on the back and thighs  
499 shows wave-shaped movements when the frog in question swims due to the edema fluid; the  
500 frog swims more sluggishly; no impairment of food intake; clear secretion is drawn off during  
501 puncture, and lymph sac collapses again immediately (see markings bottom row).

502

503

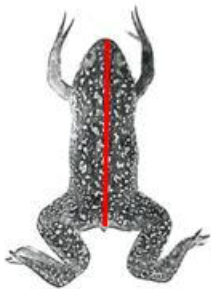

BCS 1

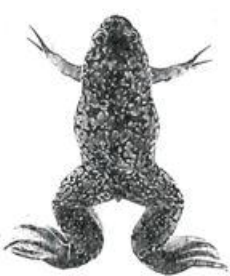

BCS 2

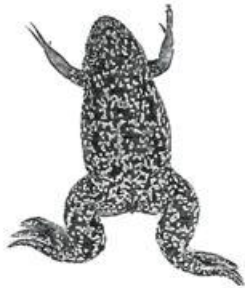

BCS 3

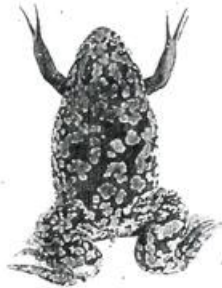

BCS 4

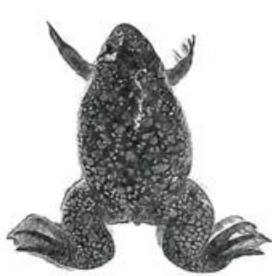

BCS 5



BCS 1

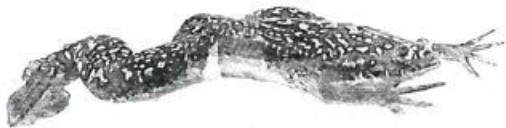

BCS 2

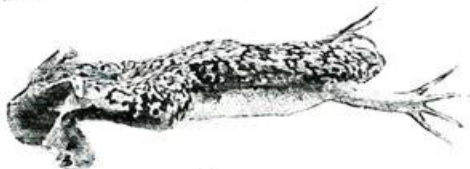

BCS 3

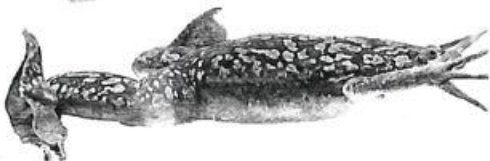

BCS 4

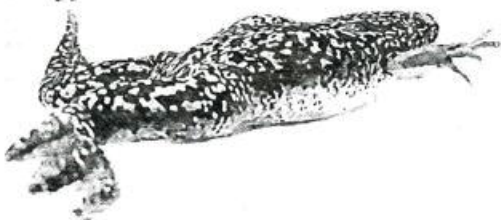

BCS 5

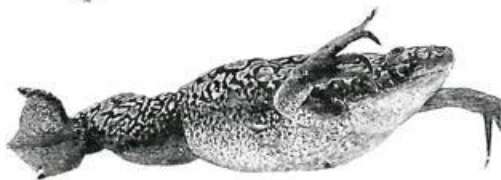

BCS 1 2 3 4 5

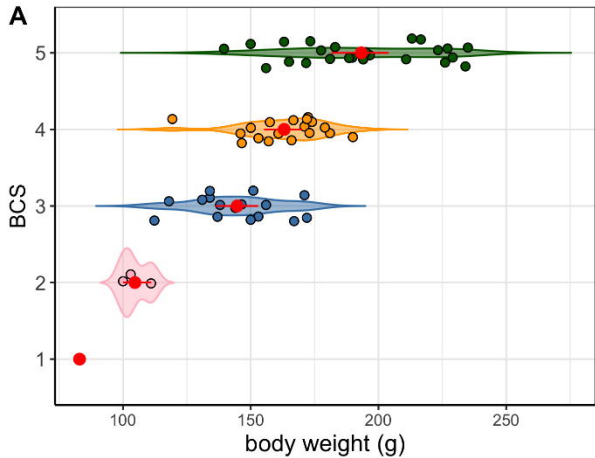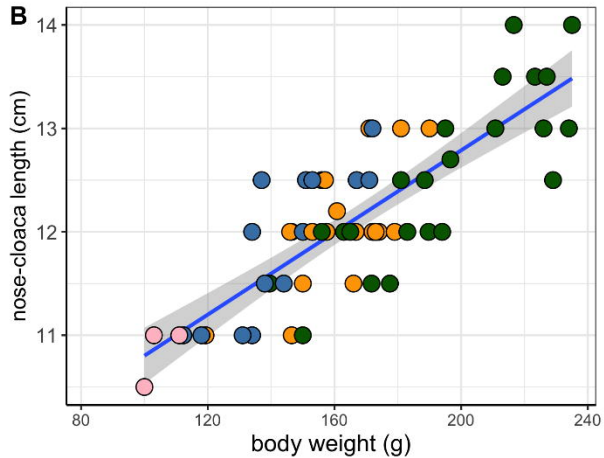

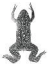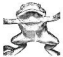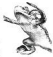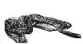

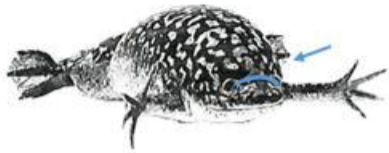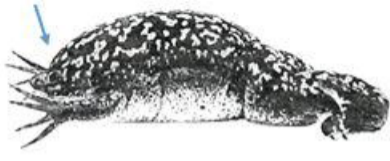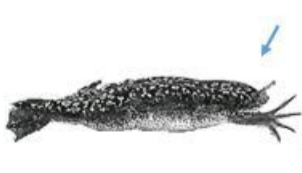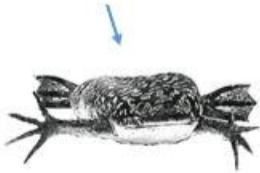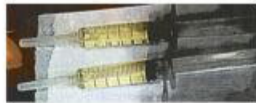

Source: https://www.biorxiv.org/content/10.1101/2022.08.03.484250v1.full.pdf
